# Supplementary material for: Li-ion storage properties of two-dimensional titanium-carbide synthesized via fast one-pot method in air atmosphere
Source: PubMed Central journal article supplement (PMC8385058; doi:10.1038/s41467-021-25306-y), 2021-08-24
Supplement: 41467_2021_25306_MOESM1_ESM.pdf [file 41467_2021_25306_MOESM1_ESM.pdf]

## Supplementary Materials for

### Li-ion storage properties of two-dimensional titanium-carbide synthesized via fast one-pot method in air atmosphere

Guoliang Ma<sup>1†</sup>, Hui Shao<sup>2,3†</sup>, Jin Xu<sup>4</sup>, Ying Liu<sup>1\*</sup>, Qing Huang<sup>5,6</sup>, Pierre-Louis Taberna<sup>2,3</sup>, Patrice Simon<sup>1,2,3\*</sup>, Zifeng Lin<sup>1\*</sup>

<sup>1</sup> College of Materials Science and Engineering, Sichuan University, Chengdu, 610065, China

<sup>2</sup> CIRIMAT, Université de Toulouse, CNRS, France

<sup>3</sup> Réseau sur le Stockage Electrochimique de l'Energie (RS2E), FR CNRS n°3459

<sup>4</sup> School of Machine Engineering, Dongguan University of Technology, Dongguan, 523808, China

<sup>5</sup> Engineering Laboratory of Advanced Energy Materials, Ningbo Institute of Materials Technology and Engineering, Chinese Academy of Sciences, Ningbo, Zhejiang 315201, China

<sup>6</sup> Qianwan Institute of CNiTECH, Zhongchuangyi Road, Hangzhou Bay District, Ningbo, Zhejiang, 315336, China

\*Correspondence to:

Prof. Patrice Simon, E-mail: [simon@chimie.ups-tlse.fr](mailto:simon@chimie.ups-tlse.fr)

Prof. Zifeng Lin, E-mail: [linzifeng@scu.edu.cn](mailto:linzifeng@scu.edu.cn)

Prof. Ying Liu, E-mail: [liuying5536@scu.edu.cn](mailto:liuying5536@scu.edu.cn)

† These authors contributed equally to this work.

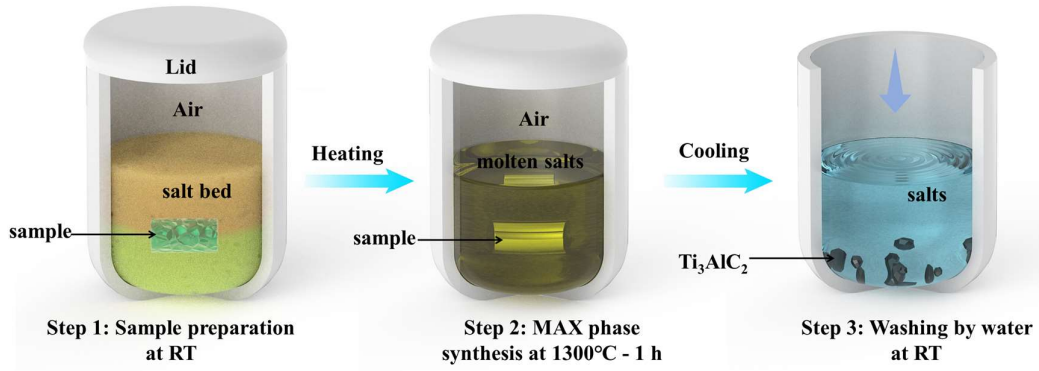

**Supplementary Fig. 1. Molten salt shielded synthesis (MS<sup>3</sup>) of MAX phase.**

Schematic diagram of the molten salt shielded synthesis (MS<sup>3</sup>) of Ti<sub>3</sub>AlC<sub>2</sub>-MAX in an air atmosphere. Sample pellet is made up of 1.45 g Ti, 0.33 g Al, 0.23 g C (3:1.2:1.9 by molar ratio) powders mixed with 1.77 g NaCl and 2.25 g KCl salts.

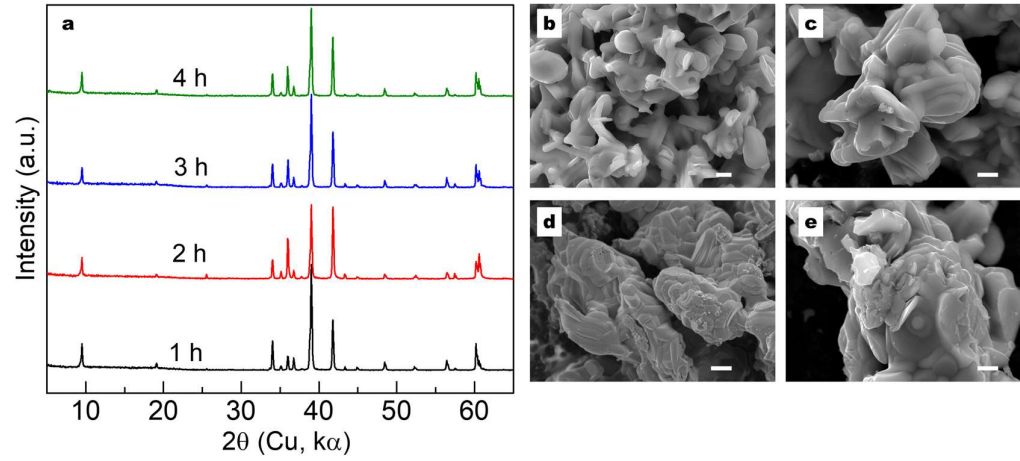

**Supplementary Fig. 2. Characterizations of  $MS^3-Ti_3AlC_2$  MAX phase. (a)** XRD patterns and **(b-e)** SEM images of  $MS^3-Ti_3AlC_2$  at 1300 °C with reaction time of **(b)** 1 h; **(c)** 2 h; **(d)** 3 h; **(e)** 4 h, scale bars are 1  $\mu m$ .

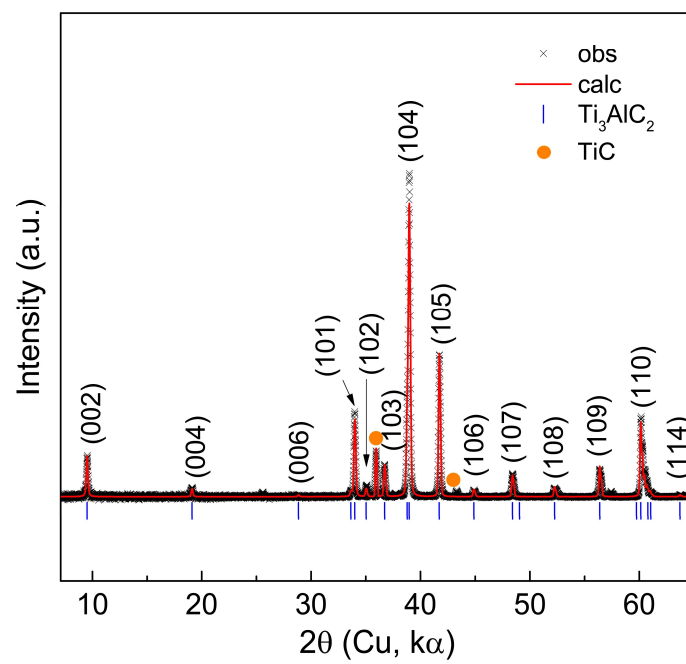

**Supplementary Fig. 3. XRD pattern and Rietveld refinement of MS<sup>3</sup>-Ti<sub>3</sub>AlC<sub>2</sub> sample.**



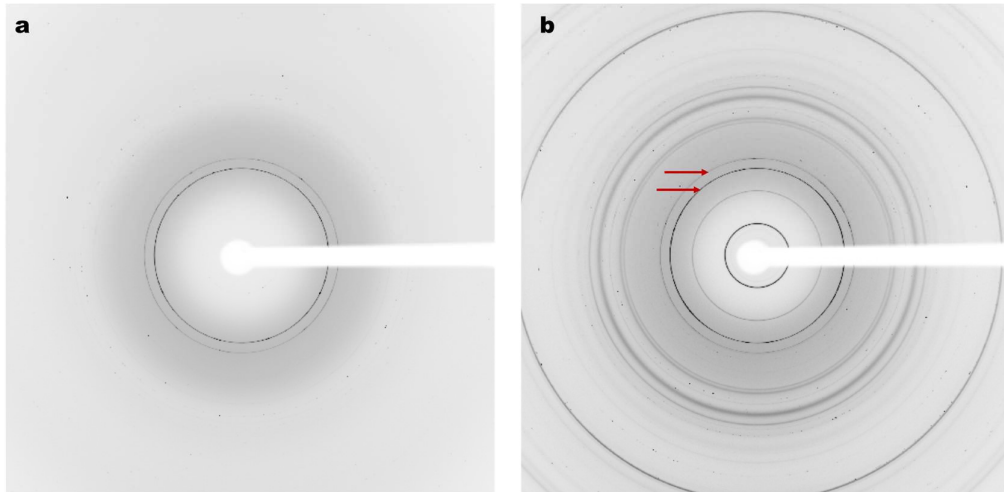

**Supplementary Fig. 4. Synchrotron X-ray diffraction analysis of one-pot synthesized  $\text{Ti}_3\text{C}_2\text{T}_x$  MXene.** 2D synchrotron XRD patterns of **(a)** sample holder (blank test), and **(b)**  $\text{Ti}_3\text{C}_2\text{T}_x$  prepared by 10 minutes etching at  $700^\circ\text{C}$ . The red arrows point to the diffraction rings of the sample holder.

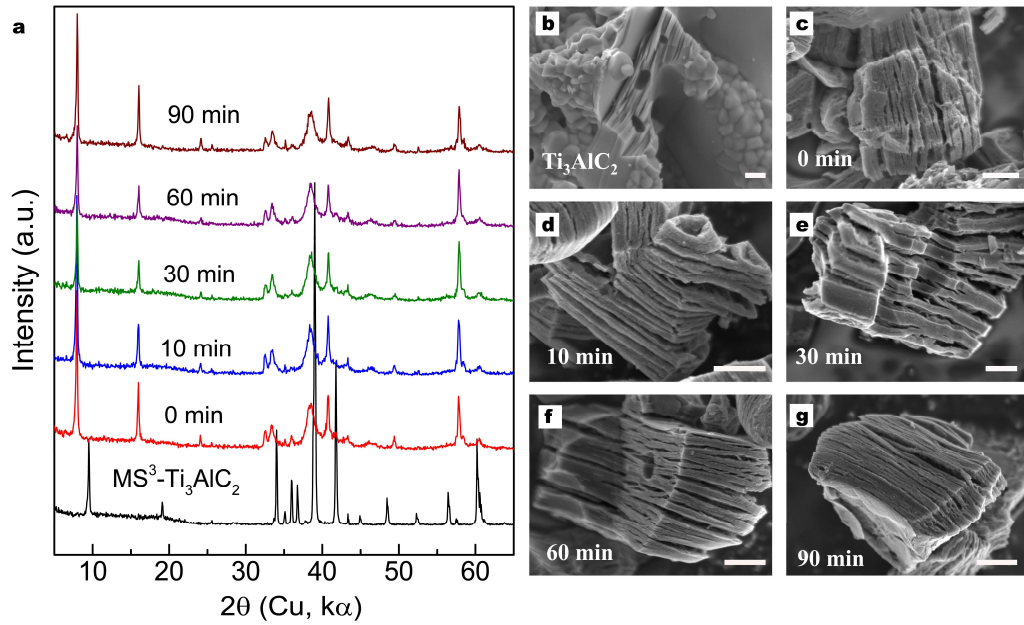

**Supplementary Fig. 5. Characterizations of  $Ti_3AlC_2$  MAX phase and one-pot synthesized  $Ti_3C_2T_x$  MXene. (a) XRD patterns and (b-g) SEM images of molten salt prepared  $Ti_3AlC_2$  and one-pot synthesized  $Ti_3C_2T_x$  MXene with 0, 10, 30, 60, 90 minutes etching reaction at 700 °C respectively, scale bars are 0.5  $\mu m$ .**

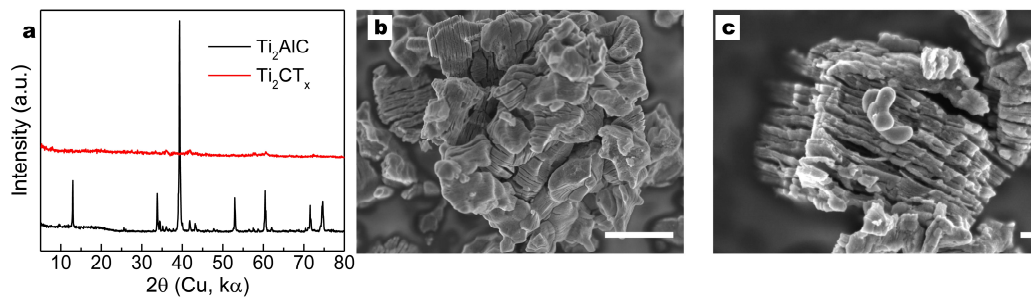

**Supplementary Fig. 6. Characterizations of one-pot synthesized  $\text{Ti}_2\text{CT}_x$  MXene.**

(a) XRD patterns of  $\text{MS}^3\text{-Ti}_2\text{AlC}$  and one-pot synthesized  $\text{Ti}_2\text{CT}_x$ ; (b) SEM images of  $\text{Ti}_2\text{CT}_x$  MXene at scale bars of (b) 1  $\mu\text{m}$ , (c) 100 nm.

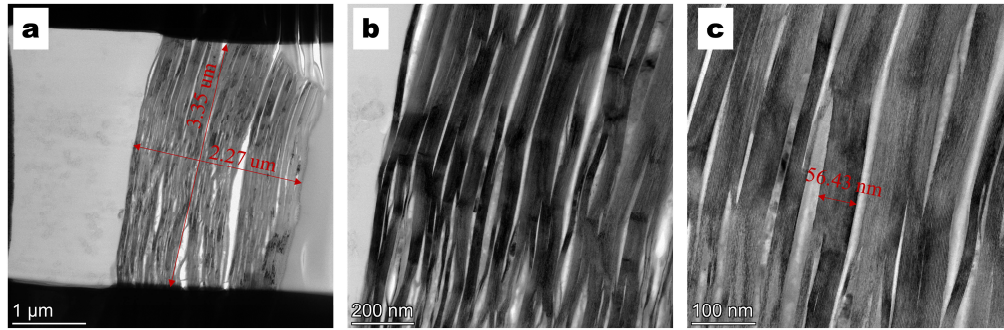

**Supplementary Fig. 7. High-resolution TEM images of cross-sectional view of a  $\text{Ti}_3\text{C}_2\text{T}_x$  MXene particle cut by FIB.** Scale bars are (a) 1  $\mu\text{m}$ , (b) 200 nm, (c) 100 nm, respectively. The particle size is about 2.27  $\mu\text{m}$  in width and 3.35  $\mu\text{m}$  in length. The  $\text{Ti}_3\text{C}_2\text{T}_x$  MXene ribbon is measured with 56.43 nm in stacking thickness.

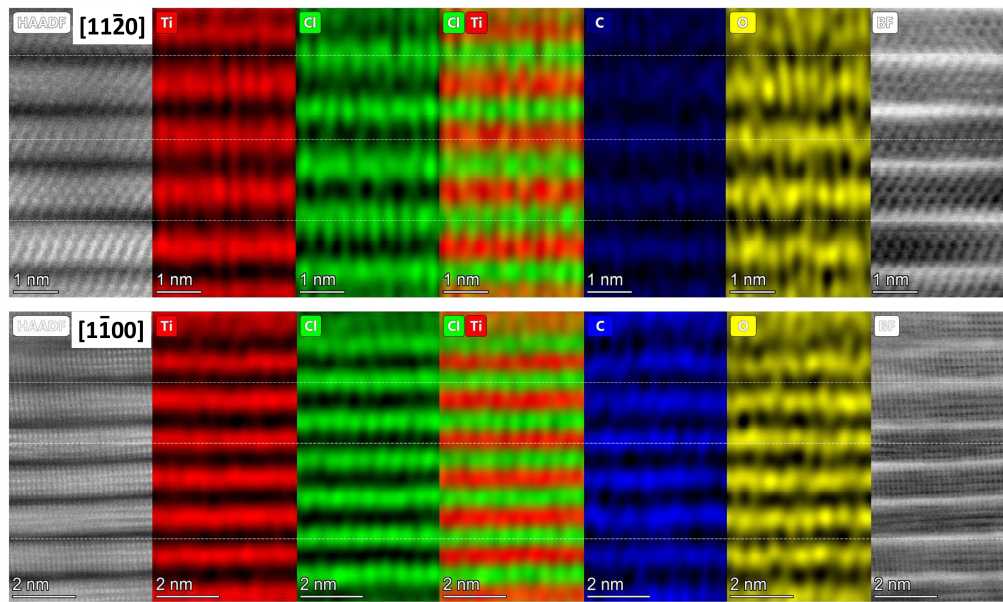

**Supplementary Fig. 8. Atomic structural analysis of  $\text{Ti}_3\text{C}_2\text{T}_x$ .** Atomic scale EDS mapping of  $\text{Ti}_3\text{C}_2\text{T}_x$  MXene along  $[11\bar{2}0]$  and  $[11\bar{1}00]$  projections.

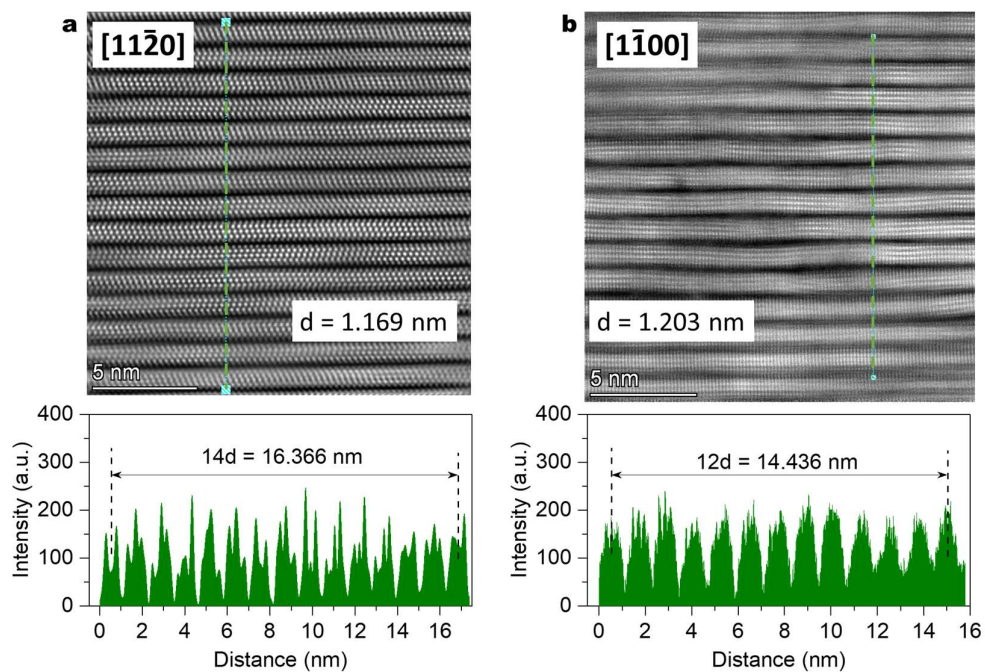

**Supplementary Fig. 9. Atomic structural analysis of interlayer spacing of  $\text{Ti}_3\text{C}_2\text{T}_x$ .**

HAADF-STEM images and corresponding HAADF intensity profiles across the  $\text{Ti}_3\text{C}_2\text{T}_x$  MXene layers along the dashed line along **(a)**  $[11\bar{2}0]$  and **(b)**  $[1\bar{1}00]$  projections.

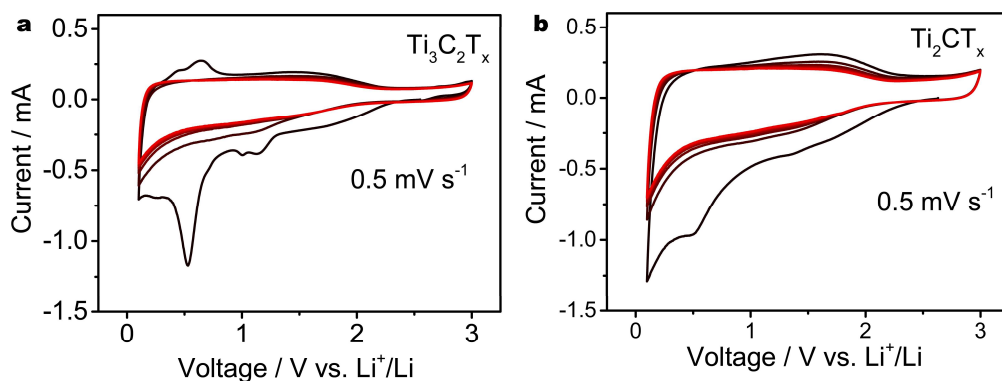

**Supplementary Fig. 10. Electrochemical characterizations of one-pot synthesized**

**MXenes.** Initial six cyclic voltammety cycles of **(a)**  $\text{Ti}_3\text{C}_2\text{T}_x$  and **(b)**  $\text{Ti}_2\text{CT}_x$  electrode

at a scan rate of  $0.5 \text{ mV s}^{-1}$ . The reduction peaks observed at about  $0.6 \text{ V vs Li}^+/\text{Li}$  of

both electrodes correspond to the formation of SEI layer<sup>1</sup>, and the reduction peak at

$1.2 \text{ V}$  of  $\text{Ti}_3\text{C}_2\text{T}_x$  electrode is assumed to be linked with irreversible reaction on defective

Ti site or under-coordinated Ti. The oxidation peak observed at the first cycle at  $0.5 \text{ V}$

of  $\text{Ti}_3\text{C}_2\text{T}_x$  electrode is not clear and under investigation currently.

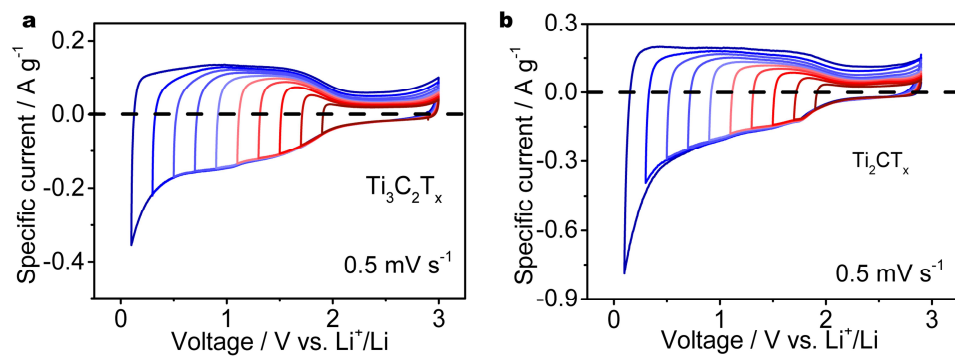

**Supplementary Fig. 11. Electrochemical characterizations of one-pot synthesized MXenes.** Cyclic voltammetry curves with various negative cut-off potentials of (a) Ti<sub>3</sub>C<sub>2</sub>T<sub>x</sub> and (b) Ti<sub>2</sub>CT<sub>x</sub> electrode at a scan rate of 0.5 mV s<sup>-1</sup>.



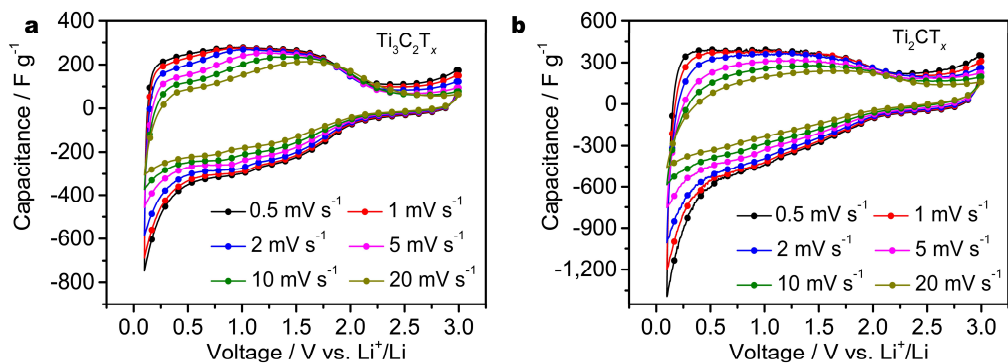

**Supplementary Fig. 12. Electrochemical characterizations of one-pot synthesized MXenes.** Cyclic voltammetry profiles of (a)  $\text{Ti}_3\text{C}_2\text{T}_x$  and (b)  $\text{Ti}_2\text{CT}_x$  electrodes at scan rates from 0.5 to 20  $\text{mV s}^{-1}$ .

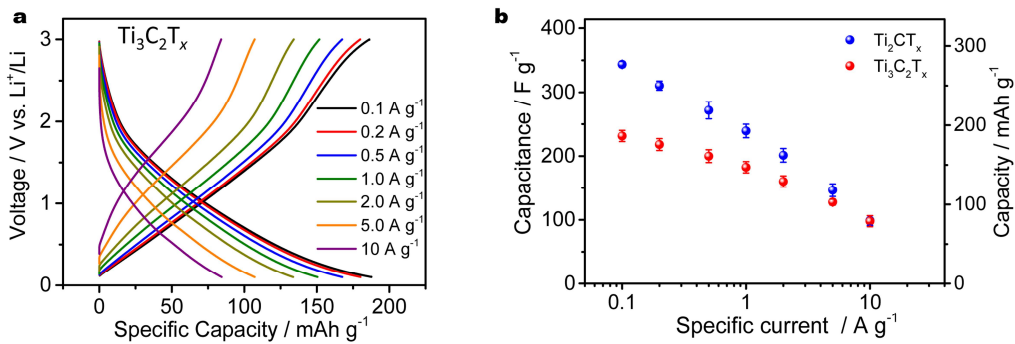

**Supplementary Fig. 13. Electrochemical characterizations of one-pot synthesized MXenes.** (a) Galvanostatic voltage profiles of  $\text{Ti}_3\text{C}_2\text{T}_x$  at specific currents range from 0.1 to 10  $\text{A g}^{-1}$ ; (b) Comparison of specific capacity vs. specific currents, the data in present figure are mean value  $\pm$  standard deviation of three electrochemical cells.

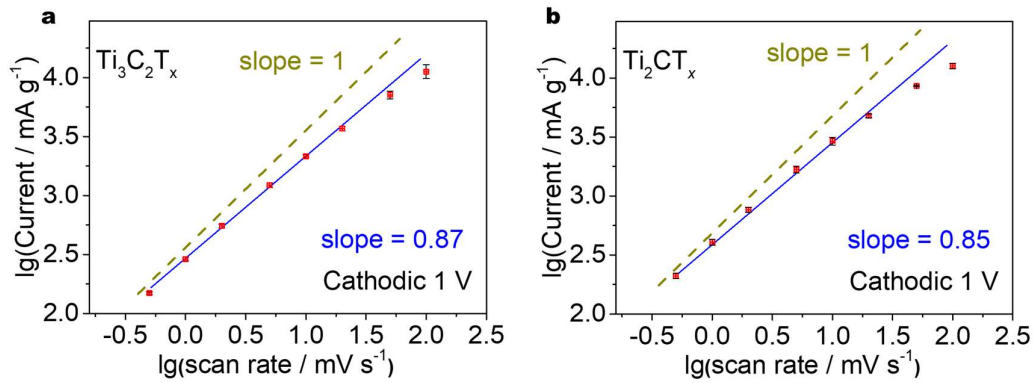

**Supplementary Fig. 14. Kinetic analysis of MXene electrodes.** *b*-value determination by the plot of  $\log(\text{scan rate})$  vs  $\log(\text{current})$ . The data in present figures are mean value  $\pm$  standard deviation of three electrochemical cells.

**Supplementary Table 1** Time consumption of each step in MXene synthesis process,

**RT**: room temperature; **MT**: maximum temperature, 1300 °C for  $\text{Ti}_3\text{C}_2\text{T}_x$ , 1000 °C for

$\text{Ti}_2\text{CT}_x$ .

| MXenes preparation                | From RT to MT (minutes) | Holding at MT (minutes) | From MT to 700 °C (minutes) | Holding at 700 °C (minutes) | From 700 °C to RT (minutes) | Total (minutes) |
|-----------------------------------|-------------------------|-------------------------|-----------------------------|-----------------------------|-----------------------------|-----------------|
| $\text{Ti}_3\text{C}_2\text{T}_x$ | 150                     | 60                      | 120                         | 0-90                        | 120                         | 450-540         |
| $\text{Ti}_2\text{CT}_x$          | 100                     | 60                      | 60                          | 10                          | 120                         | 350             |

**Supplementary Table 2** Li<sup>+</sup> storage capacities of Ti<sub>3</sub>C<sub>2</sub>T<sub>x</sub> electrode at different scan rates.

| Scan rate/<br>mV s <sup>-1</sup> | Capacitance/<br>F g <sup>-1</sup> | Capacity /<br>mAh g <sup>-1</sup> | Time / min<br>(C-rate) | Coulombic<br>efficiency / % |
|----------------------------------|-----------------------------------|-----------------------------------|------------------------|-----------------------------|
| 0.5                              | 204                               | 164                               | 96.7 (0.6)             | 98.5                        |
| 1                                | 192                               | 155                               | 48.3 (1.2)             | 98.9                        |
| 2                                | 177                               | 142                               | 24.2 (2.5)             | 99.1                        |
| 5                                | 157                               | 126                               | 9.7 (6.2)              | 99.3                        |
| 10                               | 141                               | 113                               | 4.8 (12.4)             | 99.5                        |
| 20                               | 123                               | 99                                | 2.4 (24.8)             | 99.7                        |
| 50                               | 99                                | 80                                | 0.97 (62.1)            | 99.9                        |
| 100                              | 79                                | 64                                | 0.48 (124.1)           | 100.1                       |

**Supplementary Table 3** Li<sup>+</sup> storage capacities of Ti<sub>2</sub>CT<sub>x</sub> electrode at different scan rates.

| Scan rate/<br>mV s <sup>-1</sup> | Capacitance/<br>F g <sup>-1</sup> | Capacity /<br>mAh g <sup>-1</sup> | Time / min<br>(C-rate) | Coulombic<br>efficiency / % |
|----------------------------------|-----------------------------------|-----------------------------------|------------------------|-----------------------------|
| 0.5                              | 318                               | 256                               | 96.7 (0.6)             | 97.6                        |
| 1                                | 299                               | 241                               | 48.3 (1.2)             | 97.8                        |
| 2                                | 276                               | 223                               | 24.2 (2.5)             | 98.3                        |
| 5                                | 236                               | 190                               | 9.7 (6.2)              | 98.6                        |
| 10                               | 204                               | 164                               | 4.8 (12.4)             | 99.3                        |
| 20                               | 169                               | 136                               | 2.4 (24.8)             | 99.8                        |
| 50                               | 126                               | 102                               | 0.97 (62.1)            | 99.4                        |
| 100                              | 95                                | 76                                | 0.48 (124.1)           | 98                          |

## Supplementary Reference

- 1 Li, Y. *et al.* A general Lewis acidic etching route for preparing MXenes with enhanced electrochemical performance in non-aqueous electrolyte. *Nature Materials* **19**, 894-899 (2020).
